# Supplementary material
Source: Springer Nature journal article supplement (https://www.springermedizin.de/resource/supplementary/12874_2010_615_MOESM1_ESM.pdf/9432256)

Census income  
N=2,003

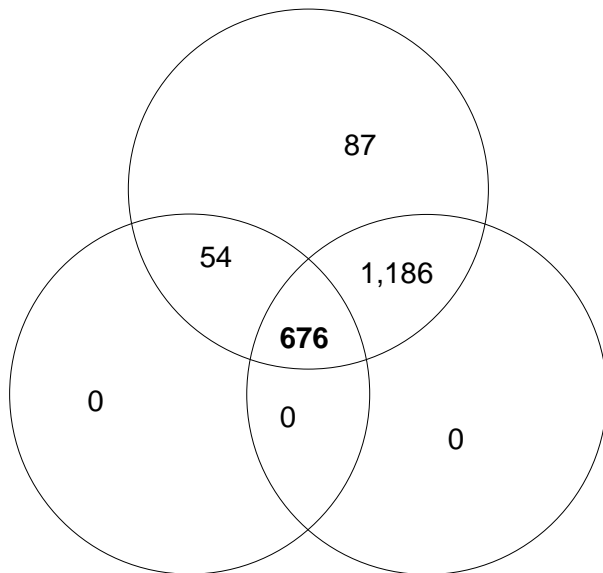

Self-reported  
income  
N=730

Residential  
value index  
N=1,862

Supplement: MOESM1 [file 9432256]
